# Supplementary material for: N-substituted defective graphene sheets: promising electrode materials for Na-ion batteries
Source: Royal Society of Chemistry journal article supplement (doi:10.1039/c4ra15010d), 2015-01-01
Supplement: c4ra15010d1.pdf [file c4ra15010d1.pdf]

## Electronic Supplementary Information

# N-substituted defective graphene sheets: promising electrode materials for Na-ion batteries

Hao Shen,<sup>a</sup> Dewei Rao,<sup>\*a</sup> Xiaoming Xi,<sup>b</sup> Yuzhen Liu,<sup>\*c</sup> and Xiangqian Shen<sup>ab</sup>

<sup>a</sup> Institute for Advanced Materials, School of Materials Science and Engineering, Jiangsu University, Zhenjiang 212013, P. R. China. E-mail: dewei@ujs.edu.cn.

<sup>b</sup> Changsha Research Institute of Mining and Metallurgy Co., Ltd, No. 966 South Lushan Road, Changsha, 410012, P. R. China.

<sup>c</sup> Department of Applied Physics, Nanjing University of Science and Technology, Nanjing 210094, PR China. E-mail: yzliu@njust.edu.cn.

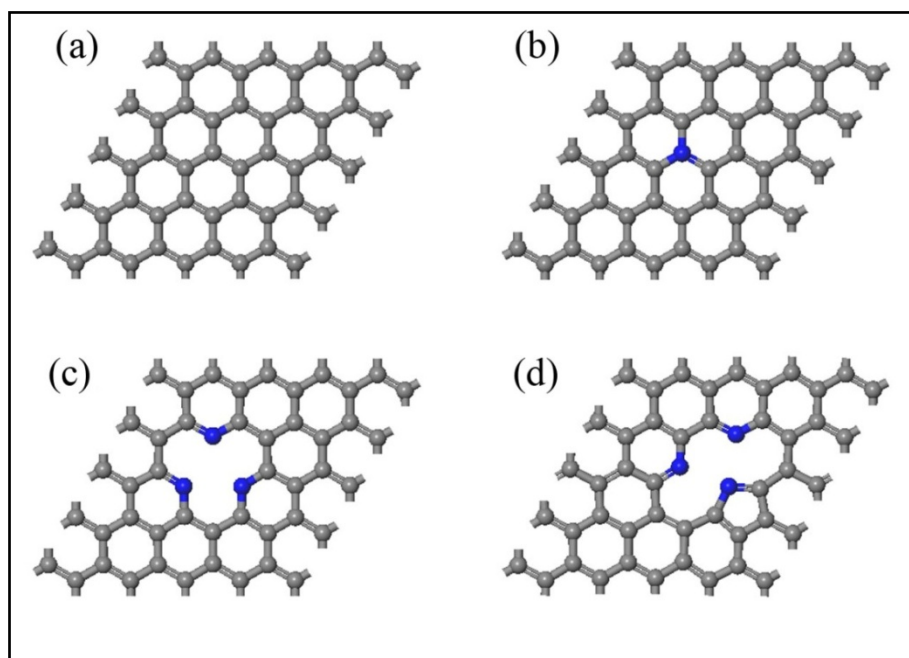

**Fig. S1** The optimized structure of pristine graphene, GG, PIG and PRG.

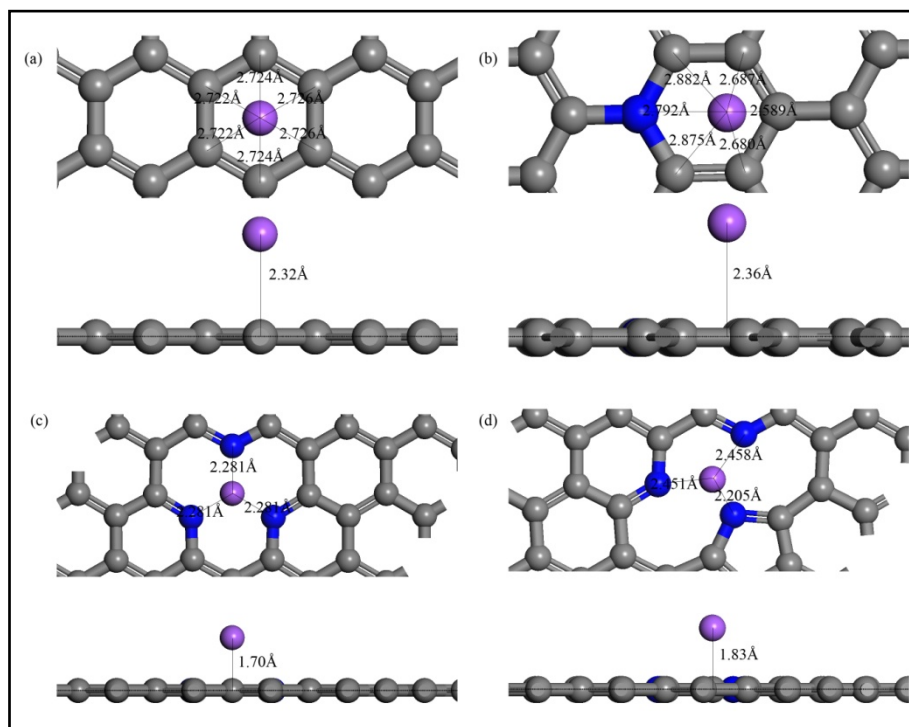

**Fig. S2** The distance between Na and surrounding C/N atoms.

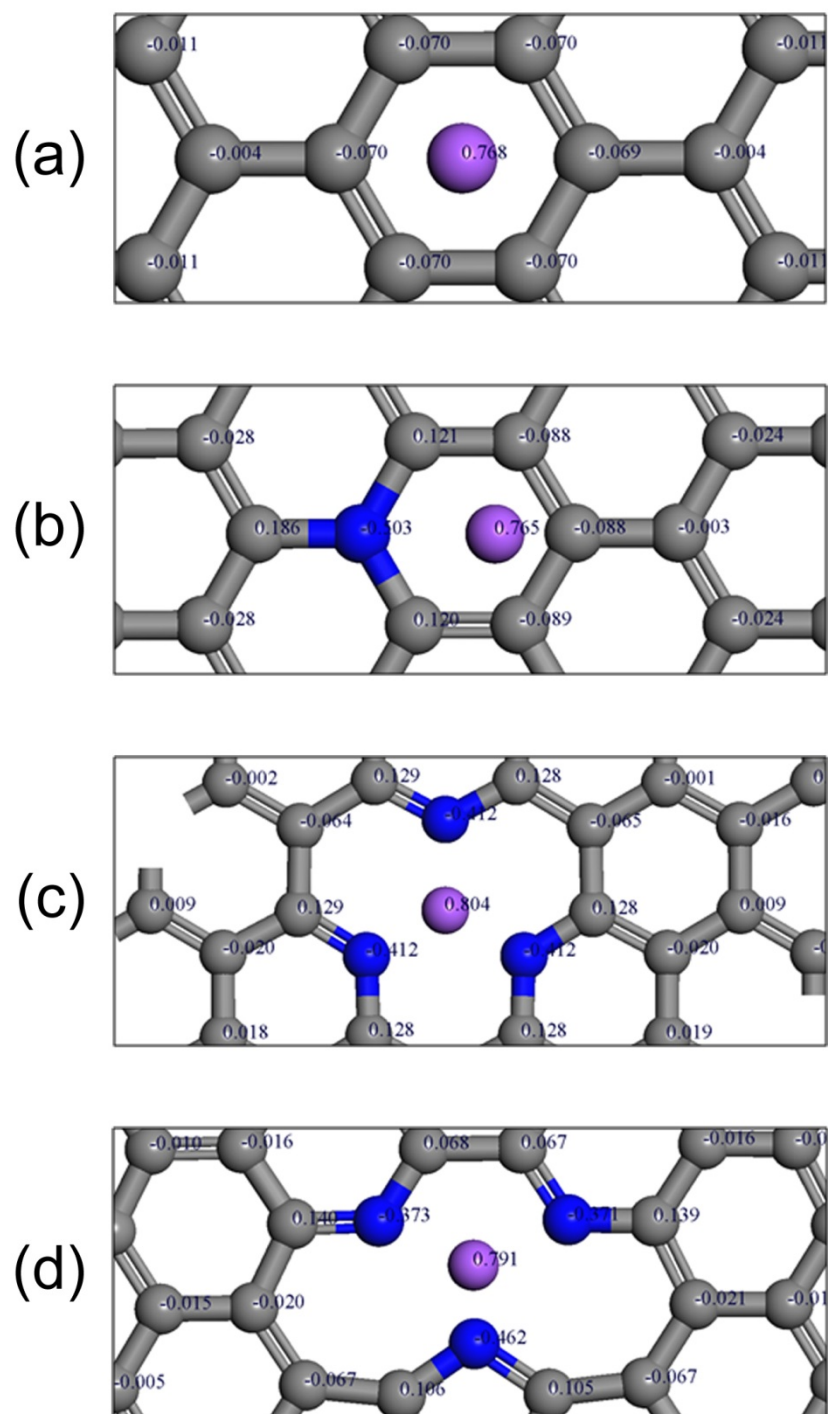

**Fig. S3** The charge distribution of Na adsorbed on pristine graphene, GG, PIG and PRG ( Using the Bader population analysis in DMol<sup>3</sup> package).

**Table S1** Detail information of 1~6 Na adsorbed structures.

|      | Pristine Graphene                                                                   | GG                                                                                  | PIG                                                                                  | PRG                                                                                   |
|------|-------------------------------------------------------------------------------------|-------------------------------------------------------------------------------------|--------------------------------------------------------------------------------------|---------------------------------------------------------------------------------------|
| 1 Na | 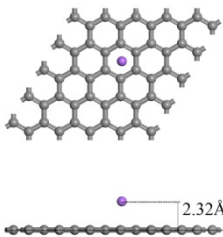   |    |    |    |
| 2 Na |    |    |    |    |
| 3 Na |   |   |   |   |
| 4 Na |  |  |  |  |
| 5 Na |  |  |  |  |
| 6 Na |  |  |  |  |
